# Supplementary material
Source: PubMed Central journal article supplement (PMC8186426)
Supplement: ntaa226_suppl_supplementary_materials.pdf [file ntaa226_suppl_supplementary_materials.pdf]

Supplemental Materials for  
Effects of Reduced-Nicotine Cigarettes Across Regulatory Environments in the Experimental  
Tobacco Marketplace: A Randomized Trial

Submitted to Nicotine and Tobacco Research

Brent A. Kaplan, PhD<sup>a</sup>, Mikhail N. Koffarnus, PhD<sup>a</sup>, Christopher T. Franck, PhD<sup>b</sup>, & Warren K. Bickel,  
PhD<sup>c,d,e</sup>

<sup>a</sup> Department of Family and Community Medicine, Lexington, KY, USA

<sup>b</sup> Department of Statistics, Virginia Tech, Blacksburg, VA, USA

<sup>c</sup> Addiction Recovery Research Center, Fralin Biomedical Research Institute at VTC, Roanoke, VA, USA

<sup>d</sup> Graduate Program in Translational Biology, Medicine, and Health, Virginia Tech, Blacksburg, Virginia, USA

<sup>e</sup> Department of Psychology, Virginia Tech, Blacksburg, VA, USA

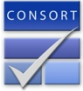

# CONSORT 2010 checklist of information to include when reporting a randomised trial\*

| Section/Topic                    | Item No | Checklist item                                                                                                                                                                              | Reported on page No |
|----------------------------------|---------|---------------------------------------------------------------------------------------------------------------------------------------------------------------------------------------------|---------------------|
| <b>Title and abstract</b>        |         |                                                                                                                                                                                             |                     |
|                                  | 1a      | Identification as a randomised trial in the title                                                                                                                                           | N/A                 |
|                                  | 1b      | Structured summary of trial design, methods, results, and conclusions (for specific guidance see CONSORT for abstracts)                                                                     | 2                   |
| <b>Introduction</b>              |         |                                                                                                                                                                                             |                     |
| Background and objectives        | 2a      | Scientific background and explanation of rationale                                                                                                                                          | 3                   |
|                                  | 2b      | Specific objectives or hypotheses                                                                                                                                                           | 4                   |
| <b>Methods</b>                   |         |                                                                                                                                                                                             |                     |
| Trial design                     | 3a      | Description of trial design (such as parallel, factorial) including allocation ratio                                                                                                        | 5                   |
|                                  | 3b      | Important changes to methods after trial commencement (such as eligibility criteria), with reasons                                                                                          | N/A                 |
| Participants                     | 4a      | Eligibility criteria for participants                                                                                                                                                       | 5                   |
|                                  | 4b      | Settings and locations where the data were collected                                                                                                                                        | 5                   |
| Interventions                    | 5       | The interventions for each group with sufficient details to allow replication, including how and when they were actually administered                                                       | 5-7                 |
| Outcomes                         | 6a      | Completely defined pre-specified primary and secondary outcome measures, including how and when they were assessed                                                                          | 8                   |
|                                  | 6b      | Any changes to trial outcomes after the trial commenced, with reasons                                                                                                                       | N/A                 |
| Sample size                      | 7a      | How sample size was determined                                                                                                                                                              | N/A                 |
|                                  | 7b      | When applicable, explanation of any interim analyses and stopping guidelines                                                                                                                | N/A                 |
| Randomisation:                   |         |                                                                                                                                                                                             |                     |
| Sequence generation              | 8a      | Method used to generate the random allocation sequence                                                                                                                                      | N/A                 |
|                                  | 8b      | Type of randomisation; details of any restriction (such as blocking and block size)                                                                                                         | 5                   |
| Allocation concealment mechanism | 9       | Mechanism used to implement the random allocation sequence (such as sequentially numbered containers), describing any steps taken to conceal the sequence until interventions were assigned | N/A                 |
| Implementation                   | 10      | Who generated the random allocation sequence, who enrolled participants, and who assigned participants to interventions                                                                     | 5                   |
| Blinding                         | 11a     | If done, who was blinded after assignment to interventions (for example, participants, care providers, those assessing outcomes) and how                                                    | 5                   |
|                                  | 11b     | If relevant, description of the similarity of interventions                                                                                                                                 | 5-7                 |
| Statistical methods              | 12a     | Statistical methods used to compare groups for primary and secondary outcomes                                                                                                               | 8                   |
|                                  | 12b     | Methods for additional analyses, such as subgroup analyses and adjusted analyses                                                                                                            | 8                   |

## Results

|                                                      |     |                                                                                                                                                   |           |
|------------------------------------------------------|-----|---------------------------------------------------------------------------------------------------------------------------------------------------|-----------|
| Participant flow (a diagram is strongly recommended) | 13a | For each group, the numbers of participants who were randomly assigned, received intended treatment, and were analysed for the primary outcome    | Figure S1 |
| Recruitment                                          | 13b | For each group, losses and exclusions after randomisation, together with reasons                                                                  | Figure S1 |
|                                                      | 14a | Dates defining the periods of recruitment and follow-up                                                                                           | 5         |
|                                                      | 14b | Why the trial ended or was stopped                                                                                                                | N/A       |
| Baseline data                                        | 15  | A table showing baseline demographic and clinical characteristics for each group                                                                  | Table 1   |
| Numbers analysed                                     | 16  | For each group, number of participants (denominator) included in each analysis and whether the analysis was by original assigned groups           | Table 1   |
| Outcomes and estimation                              | 17a | For each primary and secondary outcome, results for each group, and the estimated effect size and its precision (such as 95% confidence interval) | 9-13      |
|                                                      | 17b | For binary outcomes, presentation of both absolute and relative effect sizes is recommended                                                       | 9-13      |
| Ancillary analyses                                   | 18  | Results of any other analyses performed, including subgroup analyses and adjusted analyses, distinguishing pre-specified from exploratory         | 9-13      |
| Harms                                                | 19  | All important harms or unintended effects in each group (for specific guidance see CONSORT for harms)                                             | N/A       |
| <b>Discussion</b>                                    |     |                                                                                                                                                   |           |
| Limitations                                          | 20  | Trial limitations, addressing sources of potential bias, imprecision, and, if relevant, multiplicity of analyses                                  | 16        |
| Generalisability                                     | 21  | Generalisability (external validity, applicability) of the trial findings                                                                         | 16        |
| Interpretation                                       | 22  | Interpretation consistent with results, balancing benefits and harms, and considering other relevant evidence                                     | 14-17     |
| <b>Other information</b>                             |     |                                                                                                                                                   |           |
| Registration                                         | 23  | Registration number and name of trial registry                                                                                                    | 1         |
| Protocol                                             | 24  | Where the full trial protocol can be accessed, if available                                                                                       | 1         |
| Funding                                              | 25  | Sources of funding and other support (such as supply of drugs), role of funders                                                                   | 1         |

\*We strongly recommend reading this statement in conjunction with the CONSORT 2010 Explanation and Elaboration for important clarifications on all the items. If relevant, we also recommend reading CONSORT extensions for cluster randomised trials, non-inferiority and equivalence trials, non-pharmacological treatments, herbal interventions, and pragmatic trials. Additional extensions are forthcoming: for those and for up to date references relevant to this checklist, see [www.consort-statement.org](http://www.consort-statement.org).

## Product Listing and Prices

| Table S1. Products and prices available in the Experimental Tobacco Marketplace |                                                                    |                             |                                                                         |                     | Regulatory Environments |                      |                      |  |
|---------------------------------------------------------------------------------|--------------------------------------------------------------------|-----------------------------|-------------------------------------------------------------------------|---------------------|-------------------------|----------------------|----------------------|--|
| Category                                                                        | Product                                                            | Unit                        | Price (\$USD)                                                           | Current Marketplace | Experimental Control    | Proposed Marketplace | Combined Marketplace |  |
| Combusted Cigarette                                                             | Investigational cigarette                                          | Single cigarette            | 0.25 ea (fixed);<br>0.13, 0.25, 0.50, 1.00,<br>2.00, 4.00 ea (variable) |                     | X                       | X                    | X                    |  |
| Combusted Cigarette                                                             | Usual-brand cigarette                                              | Single cigarette            |                                                                         | X                   |                         |                      | X                    |  |
| ENDS (disposable e-cigarette)                                                   | 400 puff V2 tobacco/menthol 1.8%;<br>Blu tobacco/menthol/cherry    | Single disposable cigarette | 4.99 ea; 7.99 ea                                                        | X                   |                         | X                    | X                    |  |
| ENDS (e-liquid)                                                                 | 32 degrees menthol, American red tobacco, crazy grape 6 and 24mg/g | 2 mL bottle                 | 0.87 ea                                                                 | X                   |                         | X                    | X                    |  |
| Snus                                                                            | Camel frost/mellow/mint                                            | Single pouch                | 0.23 ea                                                                 | X                   |                         | X                    | X                    |  |
| Snus                                                                            | General classic/mint/wintergreen                                   | Single pouch                | 0.09 ea                                                                 | X                   |                         | X                    | X                    |  |
| Dip                                                                             | Skoal straight/mint/wintergreen                                    | Single pouch                | 0.26 ea                                                                 | X                   |                         | X                    | X                    |  |
| Dip                                                                             | Grizzly straight/mint/wintergreen                                  | Single pouch                | 0.21 ea                                                                 | X                   |                         | X                    | X                    |  |
| NRT                                                                             | Nicorette gum fruit/mint 4mg                                       | Single piece                | 0.40 ea                                                                 | X                   |                         | X                    | X                    |  |
| NRT                                                                             | Nicorette lozenge original/mint 4mg                                | Single piece                | 0.56 ea                                                                 | X                   |                         | X                    | X                    |  |

## Pearson Bivariate Correlations

| Table S2. Pearson Bivariate Correlations Among Demographic Variables |        |           |                |          |
|----------------------------------------------------------------------|--------|-----------|----------------|----------|
|                                                                      | Age    | Education | Monthly Income | FTND     |
| Age                                                                  |        |           |                |          |
| Education                                                            | 0.24** |           |                |          |
| Monthly Income                                                       | 0.19*  | 0.30***   |                |          |
| FTND                                                                 | -0.12  | -0.26**   | -0.17*         |          |
| Cigarettes per Day                                                   | -0.08  | -0.11     | -0.03          | 0.61**** |
| *p < .05, **p < .01, ***p < .001, ****p < .0001                      |        |           |                |          |

## Extra Sum-of-Squares F-tests (Investigational Cigarettes)

**Table S3. Comparison of  $\alpha$**

| Regulatory Environment        | Log(Q <sub>0</sub> ) | Log(Q <sub>0</sub> ) Std. Err | K | R <sup>2</sup> | Log( $\alpha$ ) | Log( $\alpha$ ) Std. Err | N    | AbsSS | Notes     | F-test                                                                                    |
|-------------------------------|----------------------|-------------------------------|---|----------------|-----------------|--------------------------|------|-------|-----------|-------------------------------------------------------------------------------------------|
| <b>Shared</b>                 |                      |                               |   |                |                 |                          |      |       |           | Summary of F-test<br>Conclusion: reject the null hypothesis<br>F(2,2711) = 30.9528, p = 0 |
| Experimental Control          | 4.964                | 2.421                         | 2 | 0.305          | -4.944          | -8.165                   | 2717 | 30238 | converged |                                                                                           |
| Proposed Marketplace Combined | 4.149                | 1.443                         | 2 | 0.305          | -4.944          | -8.165                   | 2717 | 30238 | converged |                                                                                           |
| Marketplace                   | 2.053                | 0.501                         | 2 | 0.305          | -4.944          | -8.165                   | 2717 | 30238 | converged |                                                                                           |
| <b>Not Shared</b>             |                      |                               |   |                |                 |                          |      |       |           |                                                                                           |
| Experimental Control          | 4.875                | 2.354                         | 2 | 0.350          | -5.047          | -7.935                   | 905  | 13528 | converged |                                                                                           |
| Proposed Marketplace Combined | 4.425                | 2.255                         | 2 | 0.222          | -4.583          | -7.138                   | 906  | 10744 | converged |                                                                                           |
| Marketplace                   | 4.887                | 4.651                         | 2 | 0.087          | -3.478          | -4.828                   | 906  | 52912 | converged |                                                                                           |

**Table S4. Comparison of Q<sub>0</sub>**

| Regulatory Environment        | Log(Q <sub>0</sub> ) | Log(Q <sub>0</sub> ) Std. Err | K | R <sup>2</sup> | Log( $\alpha$ ) | Log( $\alpha$ ) Std. Err | N    | AbsSS | Notes     | F-test                                                                                        |
|-------------------------------|----------------------|-------------------------------|---|----------------|-----------------|--------------------------|------|-------|-----------|-----------------------------------------------------------------------------------------------|
| <b>Shared</b>                 |                      |                               |   |                |                 |                          |      |       |           | Summary of F-test<br>Conclusion: reject the null hypothesis<br>F(2,2711) = 4.8947, p = 0.0076 |
| Experimental Control          | 4.784                | 1.957                         | 2 | 0.318          | -5.086          | -8.075                   | 2717 | 2967  | converged |                                                                                               |
| Proposed Marketplace Combined | 4.784                | 1.957                         | 2 | 0.318          | -4.475          | -7.502                   | 2717 | 2967  | converged |                                                                                               |
| Marketplace                   | 4.784                | 1.957                         | 2 | 0.318          | -3.443          | -5.837                   | 2717 | 2967  | converged |                                                                                               |
| <b>Not Shared</b>             |                      |                               |   |                |                 |                          |      |       |           |                                                                                               |
| Experimental Control          | 4.875                | 2.354                         | 2 | 0.350          | -5.047          | -7.935                   | 905  | 13528 | converged |                                                                                               |
| Proposed Marketplace Combined | 4.425                | 2.255                         | 2 | 0.222          | -4.583          | -7.138                   | 906  | 10744 | converged |                                                                                               |
| Marketplace                   | 4.887                | 4.651                         | 2 | 0.087          | -3.478          | -4.828                   | 906  | 52912 | converged |                                                                                               |

## GEE Predicting Zero Purchasing

**Table S5. GEE Predicting All Zero Purchasing**

| <i>Predictors</i>               | <b>All Zero Purchasing</b> |               |                  |
|---------------------------------|----------------------------|---------------|------------------|
|                                 | <i>Odds Ratios</i>         | <i>CI</i>     | <i>p</i>         |
| (Intercept)                     | 0.08                       | 0.03 – 0.28   | <b>&lt;0.001</b> |
| Cigarettes per Day              | 0.96                       | 0.93 – 1.00   | 0.064            |
| Experimental Control            | <i>Reference</i>           |               |                  |
| Proposed Marketplace            | 7.03                       | 3.67 – 13.45  | <b>&lt;0.001</b> |
| Combined Marketplace            | 36.45                      | 17.17 – 77.36 | <b>&lt;0.001</b> |
| 15.8mg/g                        | <i>Reference</i>           |               |                  |
| 5.2mg/g                         | 1.53                       | 0.66 – 3.53   | 0.324            |
| 2.4mg/g                         | 1.28                       | 0.56 – 2.94   | 0.560            |
| 1.3mg/g                         | 1.94                       | 0.81 – 4.65   | 0.139            |
| 0.4mg/g                         | 1.12                       | 0.46 – 2.70   | 0.804            |
| Usual Brand Flavor<br>[Menthol] | <i>Reference</i>           |               |                  |
| Tobacco                         | 1.34                       | 0.76 – 2.36   | 0.312            |
| Monthly Income (\$1000)         | 0.82                       | 0.59 – 1.14   | 0.239            |
| Multiuser Status<br>[Multiuser] | 1.52                       | 0.81 – 2.86   | 0.188            |
| N <sub>id</sub>                 | 150                        |               |                  |
| Observations                    | 450                        |               |                  |

## GEE Experimental Cigarette Purchasing

**Table S6. GEE Predicting Experimental Cigarette Purchasing**

| <i>Predictors</i>                           | <b>Experimental Cigarettes Purchased</b> |                 |              |
|---------------------------------------------|------------------------------------------|-----------------|--------------|
|                                             | <i>Estimates</i>                         | <i>CI</i>       | <i>p</i>     |
| (Intercept)                                 | 1.10                                     | -11.07 – 13.27  | 0.860        |
| Cigarettes per Day                          | 0.94                                     | 0.48 – 1.39     | <0.001       |
| Experimental Control                        | <i>Reference</i>                         |                 |              |
| Proposed Marketplace                        | -9.02                                    | -11.06 – -6.98  | <0.001       |
| Combined Marketplace                        | -19.98                                   | -22.73 – -17.22 | <0.001       |
| 15.8mg/g                                    | <i>Reference</i>                         |                 |              |
| 5.2mg/g                                     | 3.63                                     | -5.24 – 12.50   | 0.423        |
| 2.4mg/g                                     | -0.67                                    | -7.80 – 6.47    | 0.855        |
| 1.3mg/g                                     | -4.11                                    | -11.12 – 2.90   | 0.250        |
| 0.4mg/g                                     | -1.89                                    | -11.24 – 7.46   | 0.692        |
| Proposed Marketplace x Log(Cigarette price) | 18.66                                    | 13.20 – 24.13   | <0.001       |
| Combined Marketplace x Log(Cigarette price) | 41.69                                    | 34.93 – 48.44   | <0.001       |
| Sex [Female]                                | <i>Reference</i>                         |                 |              |
| Male                                        | 1.36                                     | -3.98 – 6.70    | 0.618        |
| Log(Cigarette price)                        | -52.58                                   | -60.21 – -44.94 | <0.001       |
| Monthly Income (\$1000)                     | 2.64                                     | 0.50 – 4.78     | <b>0.015</b> |
| Usual Brand Flavor [Menthol]                | <i>Reference</i>                         |                 |              |
| Tobacco                                     | -0.09                                    | -5.42 – 5.24    | 0.974        |
| N <sub>id</sub>                             | 150                                      |                 |              |
| Observations                                | 2699                                     |                 |              |



### Extra Sum-of-Squares F-tests (Conventional Cigarettes)

**Table S7. Comparison of  $\alpha$**

| Regulatory Environment       | Log(Q <sub>0</sub> ) | Log(Q <sub>0</sub> ) Std. Err | K | R <sup>2</sup> | Log( $\alpha$ ) | Log( $\alpha$ ) Std. Err | N    | AbsSS | Notes     | F-test                                                                                        |
|------------------------------|----------------------|-------------------------------|---|----------------|-----------------|--------------------------|------|-------|-----------|-----------------------------------------------------------------------------------------------|
| <b>Shared</b>                |                      |                               |   |                |                 |                          |      |       |           | Summary of F-test<br>Conclusion: reject the null hypothesis<br>F(1,1807) = 9.9752, p = 0.0016 |
| Current Marketplace Combined | 5.187                | 2.561                         | 2 | 0.470          | -5.076          | -8.607                   | 1811 | 21560 | converged |                                                                                               |
| Marketplace                  | 4.880                | 2.100                         | 2 | 0.470          | -5.076          | -8.607                   | 1811 | 21560 | converged |                                                                                               |
| <b>Not Shared</b>            |                      |                               |   |                |                 |                          |      |       |           |                                                                                               |
| Current Marketplace Combined | 5.124                | 2.418                         | 2 | 0.508          | -5.147          | -8.404                   | 906  | 10631 | converged |                                                                                               |
| Marketplace                  | 4.987                | 2.491                         | 2 | 0.430          | -4.960          | -8.071                   | 905  | 10810 | converged |                                                                                               |

**Table S8. Comparison of Q<sub>0</sub>**

| Regulatory Environment       | Log(Q <sub>0</sub> ) | Log(Q <sub>0</sub> ) Std. Err | K | R <sup>2</sup> | Log( $\alpha$ ) | Log( $\alpha$ ) Std. Err | N    | AbsSS | Notes     | F-test                                                                                                |
|------------------------------|----------------------|-------------------------------|---|----------------|-----------------|--------------------------|------|-------|-----------|-------------------------------------------------------------------------------------------------------|
| <b>Shared</b>                |                      |                               |   |                |                 |                          |      |       |           | Summary of F-test<br>Conclusion: fail to reject the null hypothesis<br>F(1,1807) = 1.7176, p = 0.1902 |
| Current Marketplace Combined | 5.072                | 2.115                         | 2 | 0.473          | -5.163          | -8.419                   | 1811 | 21462 | converged |                                                                                                       |
| Marketplace                  | 5.072                | 2.115                         | 2 | 0.473          | -4.939          | -8.221                   | 1811 | 21462 | converged |                                                                                                       |
| <b>Not Shared</b>            |                      |                               |   |                |                 |                          |      |       |           |                                                                                                       |
| Current Marketplace Combined | 5.124                | 2.418                         | 2 | 0.508          | -5.147          | -8.404                   | 906  | 10631 | converged |                                                                                                       |
| Marketplace                  | 4.987                | 2.491                         | 2 | 0.430          | -4.960          | -8.071                   | 905  | 10810 | converged |                                                                                                       |

## GEE Conventional Cigarette Purchasing

**Table S9. GEE Predicting Conventional Cigarette Purchasing**

| <i>Predictors</i>                           | <b>Conventional Cigarettes Purchased</b> |                 |                  |
|---------------------------------------------|------------------------------------------|-----------------|------------------|
|                                             | <i>Estimates</i>                         | <i>CI</i>       | <i>p</i>         |
| (Intercept)                                 | -4.93                                    | -16.19 – 6.33   | 0.391            |
| Cigarettes per Day                          | 1.25                                     | 0.81 – 1.69     | <b>&lt;0.001</b> |
| Current Marketplace                         | <i>Reference</i>                         |                 |                  |
| Combined Marketplace                        | -4.77                                    | -6.73 – -2.81   | <b>&lt;0.001</b> |
| 15.8mg/g                                    | <i>Reference</i>                         |                 |                  |
| 5.2mg/g                                     | -0.21                                    | -9.25 – 8.83    | 0.964            |
| 2.4mg/g                                     | -3.51                                    | -12.64 – 5.62   | 0.451            |
| 1.3mg/g                                     | -4.52                                    | -13.68 – 4.63   | 0.333            |
| 0.4mg/g                                     | -7.27                                    | -16.80 – 2.26   | 0.135            |
| Combined Marketplace x Log(Cigarette price) | 9.21                                     | 3.70 – 14.73    | <b>0.001</b>     |
| Sex [Female]                                | <i>Reference</i>                         |                 |                  |
| Male                                        | 5.10                                     | -0.22 – 10.41   | 0.060            |
| Log(Cigarette price)                        | -63.64                                   | -70.51 – -56.76 | <b>&lt;0.001</b> |
| Monthly Income (\$1000)                     | 3.48                                     | 1.33 – 5.62     | <b>0.001</b>     |
| Usual Brand Flavor [Menthol]                | <i>Reference</i>                         |                 |                  |
| Tobacco                                     | 2.97                                     | -2.42 – 8.37    | 0.280            |
| N <sub>id</sub>                             | 150                                      |                 |                  |
| Observations                                | 1799                                     |                 |                  |

## GEE Cigarette Substitution

**Table S10. GEE Predicting Cigarette Substitution**

| <i>Predictors</i>                            | <b>Cigarettes Purchased</b> |                |                  |
|----------------------------------------------|-----------------------------|----------------|------------------|
|                                              | <i>Estimates</i>            | <i>CI</i>      | <i>p</i>         |
| (Intercept)                                  | -18.92                      | -35.00 – -2.84 | <b>0.021</b>     |
| Cigarettes per Day                           | 1.54                        | 0.92 – 2.15    | <b>&lt;0.001</b> |
| 15.8mg/g                                     | <i>Reference</i>            |                |                  |
| 5.2mg/g                                      | -3.54                       | -16.59 – 9.51  | 0.595            |
| 2.4mg/g                                      | -0.70                       | -11.95 – 10.55 | 0.903            |
| 1.3mg/g                                      | -9.32                       | -20.55 – 1.91  | 0.104            |
| 0.4mg/g                                      | -10.75                      | -23.98 – 2.47  | 0.111            |
| Investigational Cigarette                    | <i>Reference</i>            |                |                  |
| Usual Brand Cigarette                        | 33.78                       | 28.06 – 39.51  | <b>&lt;0.001</b> |
| Usual Brand Cigarette x Log(Cigarette price) | -9.10                       | -13.38 – -4.81 | <b>&lt;0.001</b> |
| Sex [Female]                                 | <i>Reference</i>            |                |                  |
| Male                                         | 3.10                        | -4.80 – 11.01  | 0.441            |
| Log(Cigarette price)                         | 13.09                       | 8.56 – 17.62   | <b>&lt;0.001</b> |
| Monthly Income (\$1000)                      | 6.33                        | 3.06 – 9.60    | <b>&lt;0.001</b> |
| Usual Brand Flavor [Menthol]                 | <i>Reference</i>            |                |                  |
| Tobacco                                      | 5.32                        | -3.42 – 14.05  | 0.233            |
| N <sub>id</sub>                              | 150                         |                |                  |
| Observations                                 | 1799                        |                |                  |

## Estimated Marginal Means Nicotine By Regulatory Environment and Cigarette Group

| <b>Table S11. Estimated Marginal Means of Nicotine from Alternate Product Purchasing</b> |                                |                       |                           |
|------------------------------------------------------------------------------------------|--------------------------------|-----------------------|---------------------------|
| <b>Regulatory Environment</b>                                                            | <b>Estimated Marginal Mean</b> | <b>Standard Error</b> | <b>Degrees of Freedom</b> |
| <b><i>15.8mg/g</i></b>                                                                   |                                |                       |                           |
| Current Marketplace                                                                      | 15.25                          | 3.31                  | 219.86                    |
| Proposed Marketplace                                                                     | 14.93                          | 3.31                  | 219.86                    |
| Combined Marketplace (UB Price Increasing)                                               | 7.17                           | 3.31                  | 219.86                    |
| Combined Marketplace (IC Price Increasing)                                               | 6.67                           | 3.31                  | 219.86                    |
| <b><i>5.2mg/g</i></b>                                                                    |                                |                       |                           |
| Current Marketplace                                                                      | 13.67                          | 3.19                  | 220.73                    |
| Proposed Marketplace                                                                     | 16.92                          | 3.19                  | 220.73                    |
| Combined Marketplace (UB Price Increasing)                                               | 13.30                          | 3.19                  | 221.39                    |
| Combined Marketplace (IC Price Increasing)                                               | 11.36                          | 3.19                  | 220.73                    |
| <b><i>2.4mg/g</i></b>                                                                    |                                |                       |                           |
| Current Marketplace                                                                      | 15.25                          | 3.26                  | 219.42                    |
| Proposed Marketplace                                                                     | 17.42                          | 3.26                  | 219.42                    |
| Combined Marketplace (UB Price Increasing)                                               | 8.34                           | 3.26                  | 219.42                    |
| Combined Marketplace (IC Price Increasing)                                               | 8.81                           | 3.26                  | 219.42                    |
| <b><i>1.3mg/g</i></b>                                                                    |                                |                       |                           |
| Current Marketplace                                                                      | 12.29                          | 3.47                  | 213.70                    |
| Proposed Marketplace                                                                     | 25.54                          | 3.47                  | 213.70                    |
| Combined Marketplace (UB Price Increasing)                                               | 11.27                          | 3.47                  | 213.70                    |
| Combined Marketplace (IC Price Increasing)                                               | 9.62                           | 3.47                  | 213.70                    |
| <b><i>0.4mg/g</i></b>                                                                    |                                |                       |                           |
| Current Marketplace                                                                      | 4.07                           | 3.13                  | 221.60                    |
| Proposed Marketplace                                                                     | 12.70                          | 3.13                  | 221.60                    |
| Combined Marketplace (UB Price Increasing)                                               | 4.58                           | 3.13                  | 221.60                    |
| Combined Marketplace (IC Price Increasing)                                               | 3.50                           | 3.13                  | 221.60                    |

Figure S1

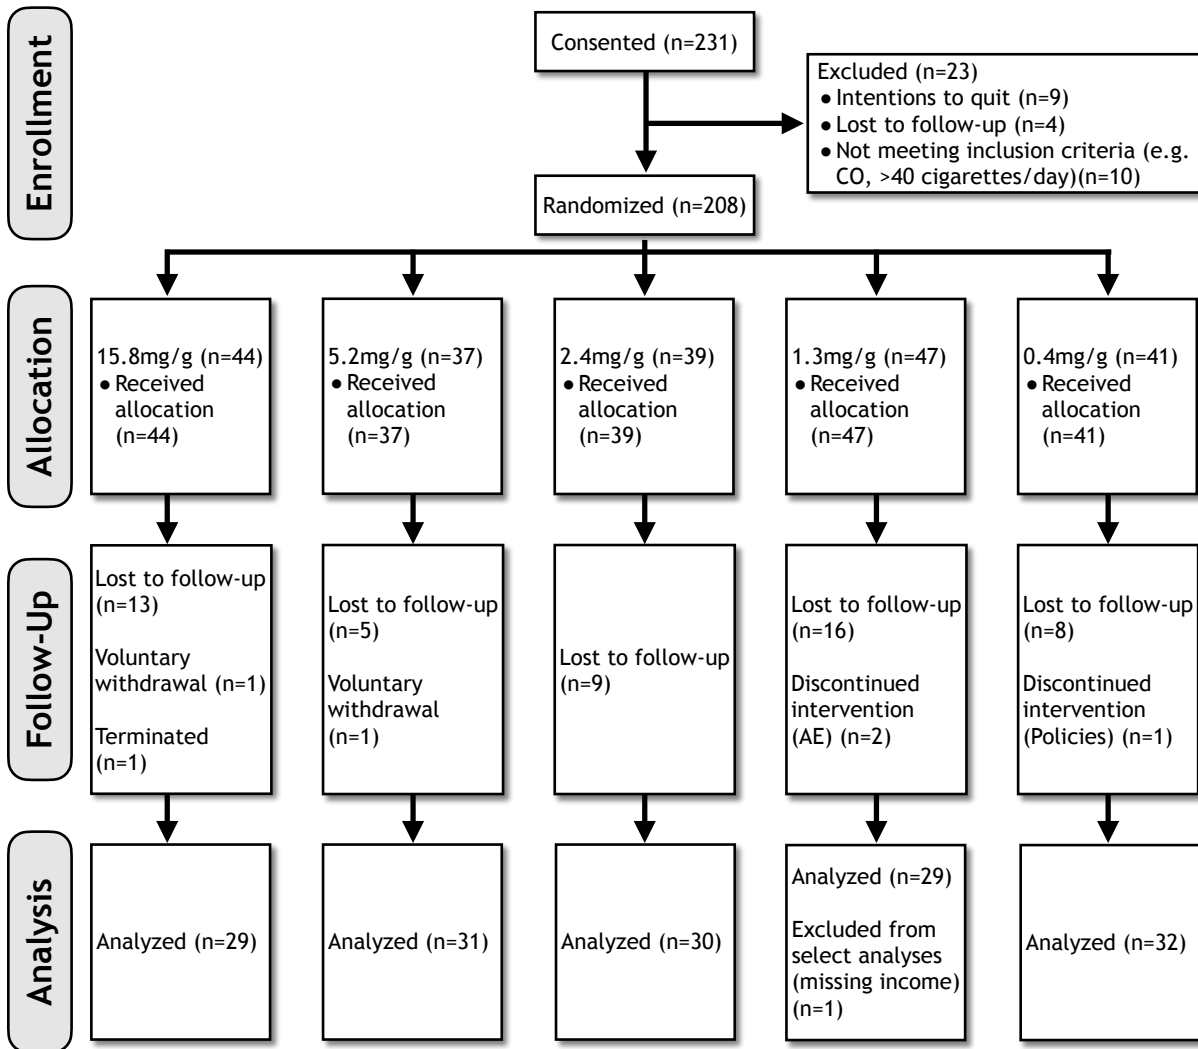

Figure S1. CONSORT diagram for this between subjects, double-blind experimental design, where randomized allocation is the between-subjects factor, and repeated measurements over time is the within-subjects factor.

Figure S2

The screenshot displays the 'Tobacco Marketplace' catalog interface. At the top left is the ARRC logo. The main header includes 'Tobacco Marketplace' and 'Catalog'. On the top right, a blue box shows a shopping cart icon, 'Empty', and '\$31.25 Remaining'. Below this, it says 'Items 1-28 Displayed'. The catalog lists five products, each with a small image, a title, a description, price, unit, quantity selector, and an 'Add to Cart' button.

| Product Name                   | Description                                                                                                                                               | Price  | Unit                          | Quantity | Action      |
|--------------------------------|-----------------------------------------------------------------------------------------------------------------------------------------------------------|--------|-------------------------------|----------|-------------|
| Experimental Cigarette         | An investigational tobacco product (experimental cigarette) that you have recently used for this study. This price is for 1 cigarette.<br>Flavor: Tobacco | \$0.13 | single cigarette              | 1        | Add to Cart |
| 400 Puff V2 Menthol Disposable | 1 400 Puff V2 Disposable E-cigarette in Menthol flavor.<br>Flavor: Menthol<br>Nicotine: 18 mg/mL nicotine.                                                | \$4.99 | single disposable e-cigarette | 1        | Add to Cart |
| 400 Puff V2 Tobacco Disposable | 1 400 Puff V2 Disposable E-cigarette in Tobacco flavor.<br>Flavor: Tobacco<br>Nicotine: 18 mg/mL nicotine.                                                | \$4.99 | single disposable e-cigarette | 1        | Add to Cart |
| Blu Disposable Cherry          | 1 Blu Disposable e-cigarette in Cherry flavor.<br>Flavor: Cherry<br>Nicotine: 24 mg/mL nicotine                                                           | \$7.99 | single disposable e-cigarette | 1        | Add to Cart |
| Blu Disposable Menthol         | 1 Blu Disposable e-cigarette in Menthol flavor.<br>Flavor: Menthol<br>Nicotine: 24 mg/mL nicotine                                                         | \$7.99 | single disposable e-cigarette | 1        | Add to Cart |

Figure S2. Actual screenshot of the Experimental Tobacco Marketplace.

Figure S3

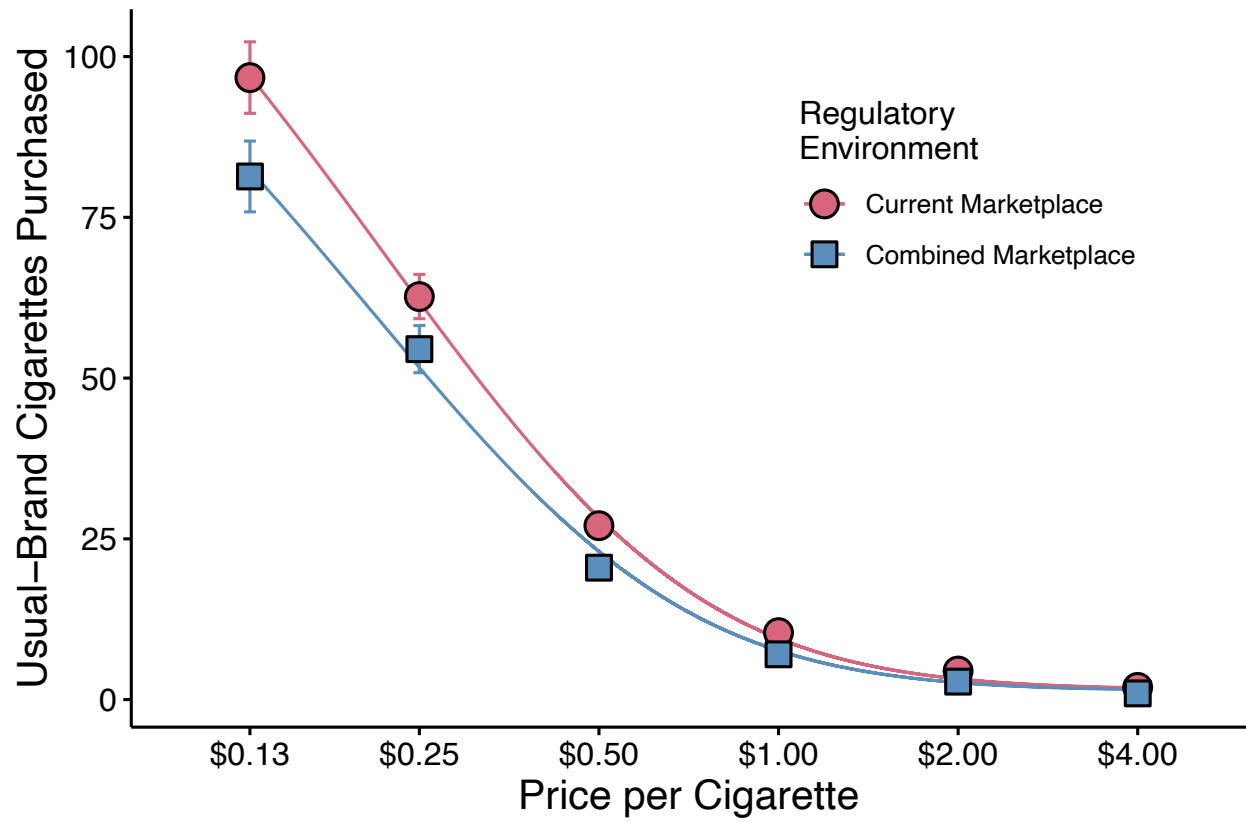

Figure S3. Usual-brand cigarettes purchased across each regulatory environment condition. Symbols represent mean and standard error of the mean.

**Figure S4**

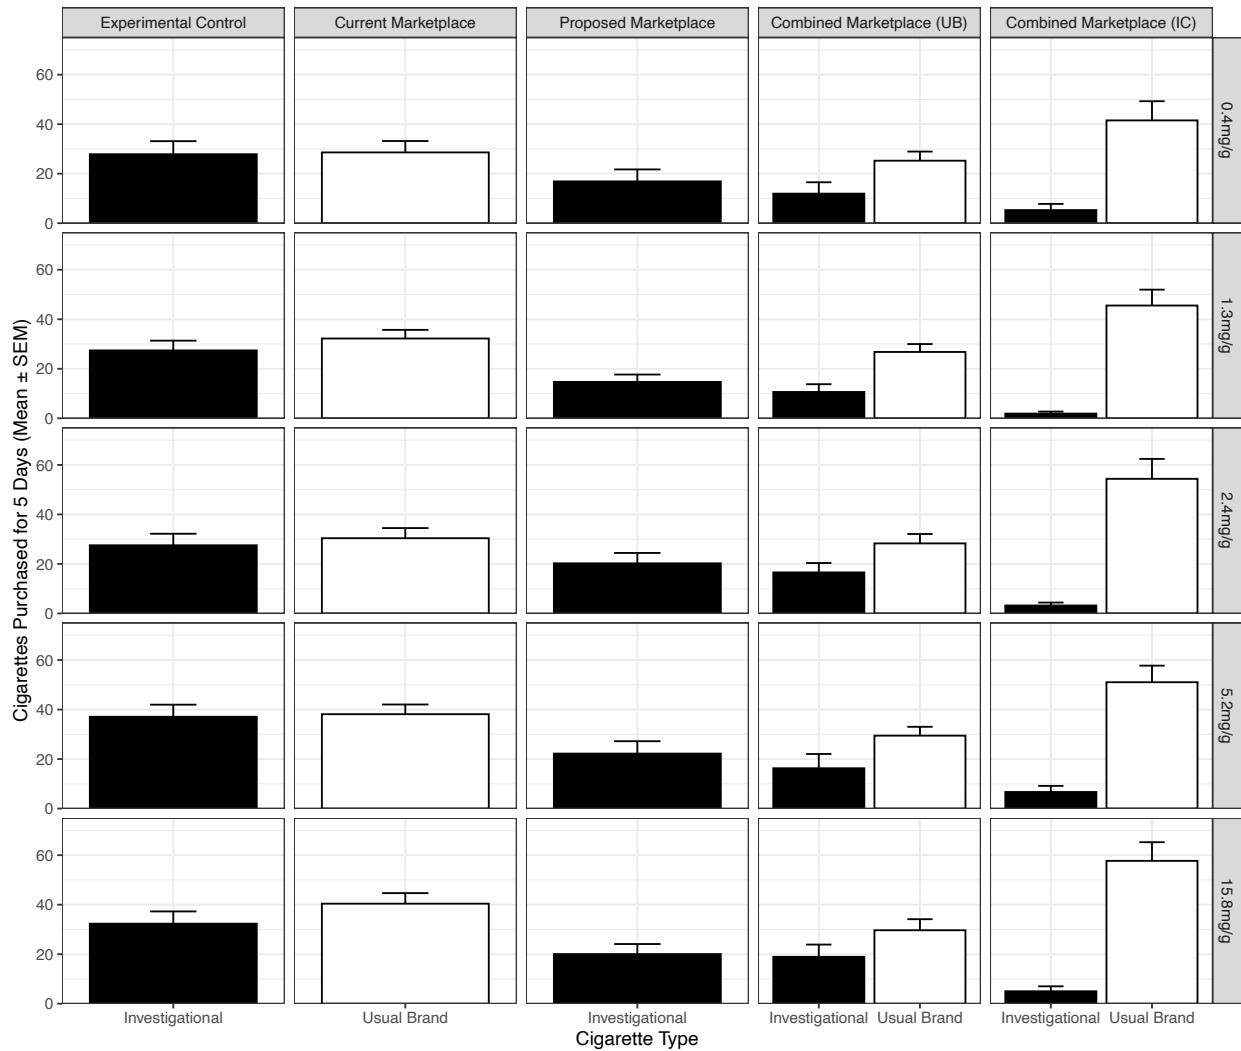

**Figure S4.** Investigational and usual-brand cigarettes purchased across each regulatory environment condition and within each cigarette group. Combined Marketplace (UB) indicates usual-brand cigarette increasing in price, whereas Combined Marketplace (IC) indicates investigational cigarette increasing in price. In both regulatory environments, the alternate cigarette was fixed at \$0.25 per cigarette.
